# Supplementary material for: New insights into microbial-mediated synthesis of Au@biolayer nanoparticles
Source: Royal Society of Chemistry journal article supplement (doi:10.1039/c8en00104a), 2018-01-01
Supplement: c8en00104a1.pdf [file c8en00104a1.pdf]

|    |                                                                                                                                                |                                 |
|----|------------------------------------------------------------------------------------------------------------------------------------------------|---------------------------------|
| 1  | <b>Electronic Supplementary Information (ESI)</b>                                                                                              |                                 |
| 2  | <b>New insights into Microbial-mediated synthesis of Au@biolayer</b>                                                                           |                                 |
| 3  | <b>Nanoparticles</b>                                                                                                                           |                                 |
| 4  | Wenjing Liu, <sup>a,b</sup> Liying Wang, <sup>a,b</sup> Jin Wang, <sup>c</sup> Jingjing Du, <sup>a,b</sup> and Chuanyong Jing <sup>a,b *</sup> |                                 |
| 5  |                                                                                                                                                |                                 |
| 6  | <sup>a</sup> State Key Laboratory of Environmental Chemistry and Ecotoxicology, Research                                                       |                                 |
| 7  | Center of Eco-Environmental Sciences, Chinese Academy of Sciences, Beijing                                                                     |                                 |
| 8  | 100085, China                                                                                                                                  |                                 |
| 9  | <sup>b</sup> University of Chinese Academy of Sciences, Beijing 100049, China                                                                  |                                 |
| 10 | <sup>c</sup> Department of Municipal & Environmental Engineering, School of Civil                                                              |                                 |
| 11 | Engineering, Beijing Jiaotong University, Beijing 100044, China                                                                                |                                 |
| 12 |                                                                                                                                                |                                 |
| 13 |                                                                                                                                                |                                 |
| 14 | ■                                                                                                                                              | 23 Pages (including cover page) |
| 15 | ■                                                                                                                                              | Materials and Methods 2-7       |
| 16 | ■                                                                                                                                              | Tables S1-S7 8-20               |
| 17 | ■                                                                                                                                              | Figures S1-S11 9-19             |
| 18 |                                                                                                                                                |                                 |
| 19 |                                                                                                                                                |                                 |

## 20 **1. Materials and Methods**

### 21 **1.1 Biogenic Au NPs in *Pantoea* sp. IMH**

22 **1.1.1 Preparation of *Pantoea* sp. IMH.** *Pantoea* sp. IMH (JX861130) from our  
23 laboratory was maintained in Luria–Bertani (LB) broth. The organism was cultivated  
24 by inoculating freshly grown bacteria in a liquid medium with LB broth. The cultures  
25 were aerobically grown to late-log phase at 30 °C. Cells were then harvested by  
26 centrifugation at 4000 g (Thermo scientific Heraeus multifuge X1R) for 3 min, washed  
27 with PBS buffer solution (pH 7.4) for three times, and used for Au NPs synthesis.

28 **1.1.2 biogenic Au NPs in *Pantoea* sp. IMH.** The harvested cells were re-suspended in  
29 PBS buffer (pH 7.4). Then, Au (III) was added to 10 mL of the above cells suspension  
30 and the final concentration of Au (III) reached to 1.8 mM. The mixture was incubated  
31 at 30 °C. Control experiments without cells were also performed. After 12 h, the cells  
32 and nanoparticles were harvested by centrifugation at 4000 g for 10 min. All of the  
33 experiments were performed in triplicate.

### 34 **1.2 Characterization of Au NPs by *Pantoea* sp. IMH**

35 **1.2.1 UV-vis spectroscopy.** The cells suspension after nanoparticles synthesis was  
36 analyzed by UV-Vis spectroscopy (UV-2550 Shimadzu).

37 **1.2.2 High-resolution Transmission Electron Microscopy (HRTEM), electron  
38 diffraction (ED), and X-ray spectrometer (EDS).** The biogenic Au NPs were  
39 observed from the electron micrographs (HRTEM; Tecnai G<sup>2</sup> F20, FEI) at a voltage of  
40 200 kV. Selected area electron diffraction (SAED) pattern was recorded from HRTEM  
41 images to obtain the crystal structure. The elemental analysis was confirmed through  
42 EDXA analysis.

43 **1.2.3 X-ray diffraction analysis.** The Au NPs were freeze-dried and prepared for X-  
44 ray powder diffraction (XRPD). The XRPD data were recorded on a Rigaku D/Max-  
45 2500 diffractometer at 40 kV, 100 mA using a Cu-target tube and a graphite  
46 monochromator. Scans were made in the 2 $\theta$  range of 10° to 90° with a step size of 0.01°  
47 and a count time of 2 s per step. Analyses of the XRPD patterns were performed using  
48 the PDF-2 reference database from the International Center for Diffraction Data  
49 database.

50 **1.2.4 Field emission scanning electron microscopy.** The cells before and after  
51 nanoparticles synthesis were washed with phosphate buffer (pH 7.4) for three times,  
52 then fixed with 2.5% glutaraldehyde in phosphate buffer (pH 7.4) for 4h and fixed in  
53 1% OsO<sub>4</sub> in phosphate buffer at 4 °C for 4h after washing thrice with the 0.1 M  
54 phosphate buffer (pH 7.4). The fixed cells were dehydrated with graded ethanol (30-  
55 100%) series after washing thrice with the 0.1 M phosphate buffer (pH 7.4) again. Then  
56 the samples were immersed in isoamyl acetate twice for 15 min. And samples were  
57 dried according to a procedure called the Critical Point Drying (CPD). Finally, the

58 powder sample was mounted on aluminum stubs using a double-sticky tape and  
59 analyzed with field emission scanning electron microscopy (FESEM) with an Oxford  
60 energy dispersive X-rayspectroscopy (EDS) analyzer (SU 8020, Hitachi). The results  
61 were shown in Figure S1.

### 62 **1.3 Preparation of thin section samples for HRTEM observation.**

63 Cells before and after nanoparticles synthesis were thoroughly washed with phosphate  
64 buffer (pH 7.4), then fixed with 0.15% glutaraldehyde in phosphate buffer (pH 7.2) at  
65 4 °C for overnight. The fixed cells were dehydrated with graded ethanol (75-100%)  
66 series and embedded in resin. The samples were then thin sectioned (70 nm) in  
67 ultramicrotome using a diamond knife, and collected on a carbon coated copper grid.  
68 However, instead of staining ultrathin sections with uranyl acetate and lead citrate,  
69 electron scattering provided by the adsorbed metal ions and synthesized nanoparticles  
70 was acted as the contrasting agent. Localization of nanoparticles within the cell was  
71 observed from HRTEM.

### 72 **1.4 Biolayer characterization.**

73 **1.4.1 Separation of extracellular biogenic Au NPs.** Cells were firstly removed by  
74 centrifugation at 4000 g for 10 min from suspension after Au NPs synthesis. Then the  
75 extracellular biogenic Au NPs were harvested from the supernatant by centrifugation  
76 (13000 g for 30 min) followed by thoroughly washing in phosphate buffer (pH 7.4) to  
77 remove other substances from nanoparticles surface. Finally, the extracellular Au NPs  
78 were concentrated to 2 mL per 100 mL reaction solution.

79 **1.4.2 Identification of phospholipid.** The method of phospholipid extraction and  
80 detection was used as reported in a previous study.<sup>1</sup> The biogenic Au NPs were  
81 extracted with 50 mL of CHCl<sub>3</sub>: CH<sub>3</sub>OH: water (4:3:3) three times to isolate polar lipids  
82 in the organic phase. Then the phospholipid extract was evaporated by centrifugation  
83 under a vacuum. The Phospholipid extracts were infused into the TurboV electrospray  
84 source of a mass spectrometer model QTRAP® 4500 (AB SCIEX). ESI-MS/MS  
85 experiments were performed in the PC, PE, PS, PA, PI, PG with fast polarity switching  
86 (50 ms) and a scan rate of 200 Da/s. In the positive ion mode, PC can be identified by  
87 scanning for precursors of m/z 184, whereas PE, PG, PI and PA give the characteristic  
88 neutral losses of 141, 172, 277, and 98, respectively.

89 **1.4.3 Identification of protein.** The proteins bound with the nanoparticles were  
90 released from the nanoparticle surface by boiling with 1% SDS solution for 10 min.  
91 The supernatant was collected by centrifugation at 13000 g for 15 min. Then, the  
92 supernatant was subjected to SDS-PAGE electrophoresis. The SDS-PAGE gels were  
93 then sequentially and vertically cut with a razor blade, giving proteins separated in the  
94 all ranges. Each gel slice was further digested with trypsin. The tryptic digested peptide  
95 samples were analyzed by Nano LC-MS/MS (Fisher Scientific, USA) as described in

96 the previous study.<sup>2</sup> For protein identification, raw data files were converted to Mascot  
97 generic format (mgf) files and searched in the National Center for Biotechnology  
98 Information (NCBI) database via Mascot Search (version 2.4, Matrix Science).  
99 Mascot search parameters included trypsin as the proteolytic enzyme with 1 missed  
100 cleavage. A minimal Mascot score of 25 and two different identified peptides were set  
101 for protein identity validation. The bioinformatics analysis was done according to the  
102 Gene Ontology (GO) annotations of identified proteins from the UniProt database  
103 (Universal Protein Resource, [www.uniprot.org](http://www.uniprot.org), UniProt release 2013\_03).

## 104 **1.5 XPS analysis for extra- and intra-cellular Au NPs**

105 **1.5.1 Collection of extracellular and intracellular Au NPs.** The cells were incubated  
106 with 1.8 mM Au(III) for 12 h before the collection of the extracellular and intracellular  
107 Au NPs. To collect the Au NPs, the suspension was passed through a 0.45  $\mu\text{m}$   
108 membrane under vacuum, followed by repeated washing with Milli-Q water. Note that  
109 Au NPs with 10~50 nm diameter could readily pass through the membrane. Then, the  
110 extracellular Au NPs were harvested from the filtrate by centrifugation (13000 g for 30  
111 min) followed by thoroughly washing in phosphate buffer (pH 7.4) to remove loosely  
112 attached substances from the NP surface.

113 After the removal of EPS and associated gold contents in the membrane, as mentioned  
114 in the EPS and membrane separation section, the cell pellets remaining on the filter  
115 membrane were disrupted by routine sonication on ice (Ultrasonic Homogenizer,  
116 SCIENTZ-IIID,  $\Phi 6$ ) at 950 W for 10 min with every 30s intervals. Then, the cell lysate  
117 was collected and resuspended to 100 mL water. The suspension was centrifuged at 350  
118 g for 3 min and the precipitate in the bottom was removed. Then the suspension was  
119 centrifuged at 1000, 2500 g for 3 min, similar with previous 350 g centrifugation  
120 process. Each step was run in three replicates. Cell debris was mainly removed from  
121 the suspension. The intracellular biogenic Au NPs were harvested from the supernatant  
122 by centrifugation (13000 g for 30 min) followed by thoroughly washing in phosphate  
123 buffer (pH 7.4) to remove other substances from nanoparticles surface.

124 Bare Au NPs without any coating were purchased from Beijing DK Nanotechnology  
125 Inc. as a control sample.

126 **1.5.2 XPS Measurement.** XPS analysis was conducted for extracellular, intracellular,  
127 and bare Au samples. The samples were vacuum dried and ground to pass a 100 mesh  
128 sieve before XPS data collection with an ESCALab 220i-XL electron spectrometer  
129 from VG Scientific using 300 W Al K $\alpha$  radiation. The base pressure was  $3 \times 10^{-9}$  Pa. The  
130 binding energies were referenced to the C1s line at 284.8 eV from adventitious carbon.  
131 XPS data processing and peak fitting were performed using XPSPeak software  
132 package.

## 133 **1.6 Dynamic process of Au NP formation.**

134 **1.6.1 Quantifying the mass of Au NPs in microbial systems.** After cells incubation  
135 with 1.8 mM Au(III) for 12 h, the batch samples were analyzed to detect concentrations  
136 of Au(III) in whole system, culture medium, membrane, and cytoplasm.

137 **Whole system.** The bacterial suspension were prepared with routine sonication on ice  
138 (Ultrasonic Homogenizer, SCIENTZ-IID,  $\Phi 6$ ) at 950 W (10 min with every 30s  
139 intervals) to disrupt cells and release all Au NPs.

140 **Medium(EPS).** The bacterial suspension was filtered through a 0.45  $\mu\text{m}$  membrane  
141 under vacuum, followed by repeated washing with Milli-Q water. Note that Au NPs  
142 had particle sizes of 10~50 nm in diameter and could readily pass through the  
143 membrane. Then the concentrations of Au(III) and total Au in the filtrate as medium  
144 were analyzed.

145 **Membrane.** The filtered bacterial pellet was first resuspended in Milli-Q water and  
146 EPS associated on the cell membrane were extracted from the bacterial suspension  
147 using the sonication/centrifugation method, as mentioned in the EPS extraction section.  
148 The supernatant was filtered through a 0.45  $\mu\text{m}$  membrane to remove unsettled cells.  
149 The filtered cells on the filter membrane were resuspended in Milli-Q water and  
150 filtered. Such a process was repeated at least 5 times to make sure that EPS and  
151 associated gold contents sorbed to cell membrane were completely washed out (verified  
152 by non-detectable gold content in the final filtrate after microwave digestion). The  
153 filtrates were collected and analyzed for the concentrations of Au in membrane location.  
154

155 **Cytoplasm.** After the removal of EPS and associated gold contents in the membrane,  
156 the remaining cell pellets were disrupted by sonication as described in the whole system  
157 section. Then the cell lysate was collected and resuspended to 100 mL, then analyzed  
158 for the concentrations of Au in the cytoplasm.

159 **Au(III) separation, Microwave indestion and ICP-MS measurement.** The every  
160 fraction sample was added into Amicon centrifugal ultrafilter units (Ultra-15 3K,  
161 Millipore, cellulose membranes with 1-2 nm pore size), and subjected to centrifugation  
162 for 30 min at 8000 g. The Au(III) in the medium were concentrated in the filtrates,  
163 whereas Au NPs were remained in the cellulose membrane. Au(III) were quantified by  
164 ICP-MS (PerkinElmer NexION 350X). Before ICP-MS determination, the separated  
165 Au(III) and total Au samples were digested by microwave-assisted digestion (CEM  
166 Mars 5, Xpress, Matthews, NC) with a procedure. Briefly, 6 mL concentrated HCl and  
167 2mL concentrated  $\text{HNO}_3$  were added into the 2 mL samples and the mixture was  
168 irradiated at 140  $^{\circ}\text{C}$  (1600 W) for 10 min, followed by 190  $^{\circ}\text{C}$  (1600 W) for 30 min.  
169 After digestion, samples were diluted with water to 15 mL and stored at 4  $^{\circ}\text{C}$  for further  
170 analysis. By respective determining the total Au concentration (TAu) without  
171 ultrafiltration and the concentration of the Au(III) (Au(III)) in the filtrate after

172 ultrafiltration, the Au NPs concentration (Au NPs) was calculated as  $Au\ NPs = T_{Au} -$   
173  $Au(III)$ . Triplicate samples were run for the analysis of  $Au(III)$  at each fraction of  
174 microbial systems. The data were reported as the mean  $\pm$  standard deviation.

175 **1.6.2 XANES-LCF Analysis.** The XANES spectra at the Au L-edge (eV) were  
176 collected at beamline 14W1 in the Shanghai Synchrotron Radiation Facility, China. An  
177 energy range of -200 to 1000 eV from the L-edge of Au (11919 eV) was used to acquire  
178 the spectra. The spectra were analyzed using a linear combination fit in the Athena  
179 program in the IFEFFIT computer package.<sup>3</sup> The data processing and fitting approach  
180 are similar to that used in our previous study.<sup>4</sup>

## 181 **1.7 Extracellular mechanism: EPS role.**

182 **1.7.1 EPS extraction and Au NPs synthesis.** The bacteria were separated from the  
183 medium by centrifugation (6000 g at 4 °C), followed by repeated washing with sterile  
184 water for three times. The bacteria were then suspended to 50% of the original volume.  
185 EPS was extracted from the bacterial suspension, as described in the literature.<sup>5</sup> The  
186 bacterial suspension was processed by ultrasound with an intensity of 2.7 W cm<sup>2</sup> at a  
187 frequency of 40 kHz at 4 °C for 10 min, and then centrifuged at 12000 g at 4 °C for 20  
188 min to separate the cells. Then the supernatant was collected and filtered through a 0.45  
189  $\mu$ m membrane to remove unsettled cells. The filtrate (aqueous EPS) was stored at 4 °C.  
190 To synthesize Au NPs, Au (III) was added to 10 mL of the above aqueous EPS and the  
191 final concentration of Au (III) reached to 1.8 mM. The mixture was incubated at 30 °C  
192 for 12h. The aqueous EPS before and after Au(III) reaction were freeze-dried at -65 °C  
193 for later FTIR experiment.

194 **Exopolysaccharides extraction method.** Exopolysaccharides were extracted from the  
195 aqueous EPS as described in the literature.<sup>6</sup> The EPS solution was added three fold  
196 volumes of 95% ethanol, and exopolysaccharides were precipitated. Then, the mixture  
197 was chilled at 4 °C for 24 h. The resulting precipitates were recovered by centrifugation  
198 at 10000 g for 15 min. The precipitates were washed with 90% ethanol–water mixtures  
199 and freeze-dried at -65 °C for later experiment.

200 **1.7.2 FTIR characterization.** Infrared spectra of EPS before and after nanoparticles  
201 synthesis were collected on Thermo-Nicolet Nexus 6700 FTIR spectrometer equipped  
202 with a liquid-nitrogen-cooled mercury–cadmium–telluride (MCT) detector. The  
203 pressed pellets were prepared by grinding the samples with KBr in a mortar at the ratio  
204 of 1:100 and analyzed over 256 scans with a resolution of 4 cm<sup>-1</sup>.

## 205 **1.8 Intracellular mechanism: transcriptome analysis.**

206 **1.8.1 RNA Isolation and cDNA Synthesis.** The strain was cultivated by inoculating  
207 freshly grown bacteria in a liquid medium with LB broth. The cultures were aerobically  
208 grown to late-log phase at 30 °C. Cells were then harvested by centrifugation at 4000 g  
209 for 3 min, washed with PBS buffer solution (pH 7.4) for three times. The harvested

cells were re-suspended in PBS buffer (pH 7.4). Then, Au (III) was added to the above cells suspension and the final concentration of Au (III) reached to 200  $\mu$ M. The mixture was incubated at 30 °C for 0, 10, 35 min to isolate total RNA. RNA isolation was carried out using Trizol reagent (TIANGEN, Beijing, China) according the manufactory's direction. The concentration and quality of total RNA was measured using NanoDrop 2000 (Thermo Scientific, USA). The isolated RNA was used for further transcriptome analysis and reverse transcription for cDNA synthesis. The reverse transcription was performed by PrimeScript RT reagent Kit with gDNA Eraser (Takara, Japan). The cDNA was stored at –80 °C for further expression analysis.

**1.8.2 Transcriptome Analysis.** Transcriptome sequences are obtained from Illumina HiSeq 2000 sequencers.<sup>7</sup> All the high quality sequences were aligned against the reference genome with the spliced aligner TopHat. We used reads mapped to the genome to calculate every gene's expression in each sample. Then RPKM (Reads Per Kb per Million reads) was used to estimate expressions of genes so as to normalize the effects of different gene lengths and different total mapped reads among samples.<sup>8</sup> Differentially expressed genes (DEGs) were detected, as described in the literature.<sup>9</sup> P-value was used to test the statistical significance, and FDR (false discovery rate) was used to determine the threshold of P-value in multiple tests. Finally, the threshold with “FDR  $\leq$  0.050” and “absolute value of log2Ratio  $\geq$  10” was set to judge the significance of differences. We mapped all DEGs to GO terms in the database, calculating gene numbers for every term, then used hypergeometric test to find significantly enriched GO terms in DEGs comparing to the genome background.

**1.8.3 Quantitative Real Time PCR Verification.** To verify the transcriptome data, real time quantitative PCR assays were performed to analyze the relative expression levels of the several genes in the Au(III) treated cells for different induction time. Housekeeping gene (16S) was used as a reference gene to normalize mRNA expression of other related genes. Primer information is shown in Table S6. Every sample was run twice with three replicating. The quantification of target gene expression was based on a comparative cycle threshold (Ct) value. The expression level of each target gene was normalized to its reference gene 16s (Ct). The fold change of each gene was analyzed by the  $2^{-\Delta\Delta Ct}$  method.<sup>10</sup>

## 2 Results and discussion

**Table S1.** List of bacteria that synthesize Au nanoparticles

| Bacteria | Size (nm)/Shape | Localization | Reference |
|----------|-----------------|--------------|-----------|
|----------|-----------------|--------------|-----------|

|                                       |                                           |                                  |    |
|---------------------------------------|-------------------------------------------|----------------------------------|----|
| <i>Bacillus subtilis</i> 168          | 5~25/ Octahedral                          | cell wall                        | 11 |
| <i>Plectonema boryanum</i>            | <10-25/ Cubic                             | Membrane vesicles                | 12 |
| UTEX 485                              | <10/ Octahedral                           | Intracellular                    |    |
|                                       | platelets                                 |                                  |    |
| <i>Ralstonia metallidurans</i>        | grains and nuggets                        |                                  | 13 |
| <i>Rhodopseudomonas capsulate</i>     | 10–400/ Spherical, triangular, nanoplates | Extracellular                    | 14 |
|                                       | 10–30/ Spherical, 50–60/ nanowire         |                                  |    |
| <i>Cupriavidus metallidurans</i> CH34 | particulate Au                            | Intra- and extracellular         | 15 |
| <i>Brevibacterium casei</i>           | 10–50/ spherical                          | Extracellular                    | 16 |
| <i>Shewanella algae</i>               | 10-350/ Triangular, hexagonal             | Periplasmic space, extracellular | 17 |
| <i>Synechocystis</i> sp. PCC 6803     |                                           | intracytoplasmic membranes       | 18 |
| <i>Shewanella oneidensis</i> MR-1     | ~5 /spherical                             | Intracellular                    | 19 |
|                                       |                                           | Extracellular                    |    |
| <i>Micrococcus luteus</i>             | ~50/ spherical                            | Extracellular                    | 20 |
| <i>Geobacillus stearothermophilus</i> | ~12 /spherical                            | Extracellular                    | 21 |
| <i>Delftia acidovorans</i>            | spherical                                 |                                  | 22 |
|                                       | octahedral                                |                                  |    |
| <i>Shewanella putrefaciens</i> CN32   | spherical                                 | cell wall                        | 23 |
| <i>Escherichia coli</i> K12           | ~50/ nanoplates                           | Extracellular                    | 24 |
| <i>Spirulina platensis</i>            | 6~10                                      | Extracellular                    | 25 |
| Sulfate-reducing bacteria             | <10                                       | Intracellular                    | 26 |
|                                       | <25                                       | Extracellular                    |    |
| <i>Bacillus licheniformis</i>         | 10~100/ Cubic                             | Extracellular                    | 27 |
| <i>Rhodobacter capsulatus</i>         |                                           | Plasma membrane                  | 28 |
| <i>Bacillus megatherium</i> D01       | 1.9 ± 0.8/ Spherical                      | Extracellular                    | 29 |
| <i>Escherichia coli</i> DH5α          | Spherical                                 | Cell surface                     | 30 |
| <i>Lactobacillus</i> sp.              | 20~50 /Hexagonal                          | Cell surface                     | 31 |



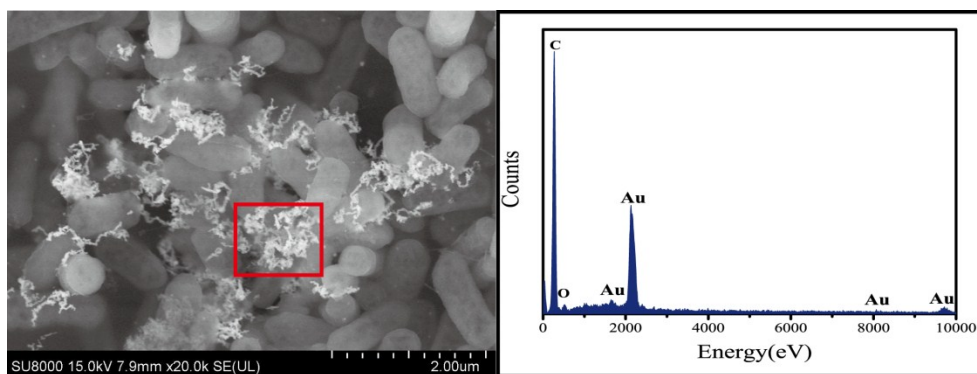

248

249 **Figure S1.** SEM image and EDS results show formation of biogenic Au NPs on the  
250 surface *Pantoea* sp. IMH.

251

252 **Table S2.** The mass of Au(III) and Au NPs in the extracellular medium (EPS),  
253 membrane, and cytoplasm.

| Au Con.<br>(mg) | Whole        | Medium(EPS)  | Membrane    | Cytoplasm   |
|-----------------|--------------|--------------|-------------|-------------|
| Total Au        | 35.07 ± 0.12 | 25.02 ± 0.29 | 0.08 ± 0.00 | 9.85 ± 0.09 |
| Au(III)         | 9.46 ± 0.22  | 7.68 ± 0.02  | 0.00 ± 0.00 | 1.58 ± 0.06 |
| Au NPs          | 25.61 ± 0.24 | 17.34 ± 0.29 | 0.08 ± 0.00 | 8.27 ± 0.12 |

254

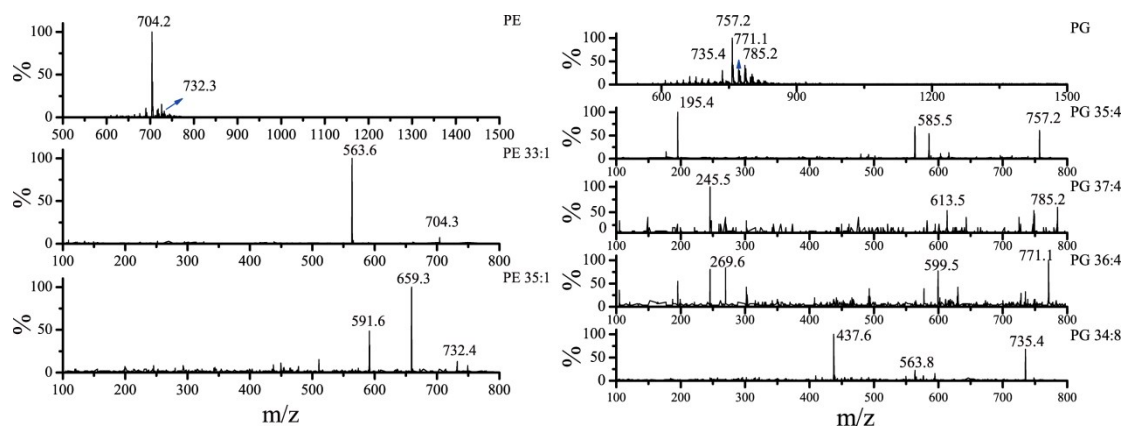

255

256 **Figure S2.** MS spectrum on phosphatidyl ethanolamine (PE) and phosphatidyl glycerol  
257 (PG) from biolayer

258

259

260

261

262

263 **Table S3.** Mass Measurements by Qtrap-MS for lipid identification (m/z).

|      | M+H   | Fragment   | MW    | Proposed lipid |
|------|-------|------------|-------|----------------|
| PE-1 | 704.2 | 563.6(-PE) | 703.5 | PE 33:1        |

|      |       |            |       |  |           |
|------|-------|------------|-------|--|-----------|
|      |       |            |       |  | PE O-34:1 |
| PE-2 | 732.3 | 591.6(-PE) | 731.5 |  | PE 35:1   |
|      |       |            |       |  | PE O-36:1 |
| PG-1 | 757.2 | 585.5(-PG) | 756.5 |  | PG 35:4   |
|      |       |            |       |  | PG O-36:4 |
| PG-2 | 785.2 | 613.5(-PG) | 784.5 |  | PG 37:4   |
|      |       |            |       |  | PG O-38:4 |
| PG-3 | 771.1 | 599.5(-PG) | 770.5 |  | PG 36:4   |
|      |       |            |       |  | PG O-37:4 |
| PG-4 | 735.4 | 563.8(-PG) | 734.4 |  | PG 34:8   |
|      |       |            |       |  | PG O-35:4 |
| 264  | <hr/> |            |       |  |           |
| 265  |       |            |       |  |           |
| 266  |       |            |       |  |           |
| 267  |       |            |       |  |           |
| 268  |       |            |       |  |           |
| 269  |       |            |       |  |           |

**Table S4.** Proteins identified by LC-MS/MS

| Protein<br>32-34             | Name | Accession no. <sup>a</sup>      | Protein annotation                                                  | Mascot<br>score | Calculated<br>Mass(Da) <sup>b</sup> | Sequence<br>coverage <sup>c</sup> | Identified<br>peptides |
|------------------------------|------|---------------------------------|---------------------------------------------------------------------|-----------------|-------------------------------------|-----------------------------------|------------------------|
| Membrane<br>Protein          |      | gi 687259738 gb KGD82872.1      | membrane protein [ <i>Pantoea stewartii</i> subsp. indologenes]     | 453             | 40677                               | 9%                                | 3                      |
|                              |      | gi 671628669 ref WP_031592851.1 | membrane protein [ <i>Pantoea agglomerans</i> ]                     | 1109            | 41111                               | 15%                               | 5                      |
| Outer<br>membrane<br>protein |      | gi 666372489 gb KEY42626.1      | outer membrane protein A [ <i>Pantoea agglomerans</i> ]             | 103             | 38402                               | 14%                               | 5                      |
|                              |      | gi 666372862 gb KEY42999.1      | outer membrane porin protein [ <i>Pantoea agglomerans</i> ]         | 121             | 38989                               | 5%                                | 7                      |
| Lipoprotein                  |      | gi 685439174 gb KGB00005.1      | major outer membrane lipoprotein Lpp [ <i>Pantoea agglomerans</i> ] | 191             | 8443                                | 30%                               | 2                      |
|                              |      | gi 685440672 gb KGB01503.1      | outer membrane lipoprotein slyB [ <i>Pantoea agglomerans</i> ]      | 78              | 15452                               | 15%                               | 2                      |
|                              |      | gi 685441399 gb KGB02227.1      | maltose-binding periplasmic protein [ <i>Pantoea agglomerans</i> ]  | 41              | 43033                               | 2%                                | 2                      |
|                              |      |                                 |                                                                     |                 |                                     |                                   |                        |
| Malto porin                  |      | gi 691221133 gb AIR84418.1      | malto porin [ <i>Pantoea rwandensis</i> ]                           | 157             | 48246                               | 6%                                | 2                      |

a. NCBI nr database accession number.

b. Theoretical values for protein precursors obtained from the NCBI database (<http://www.ncbi.nlm.nih.gov>).

c. Percentage of protein sequence covered by the experimentally detected peptides.

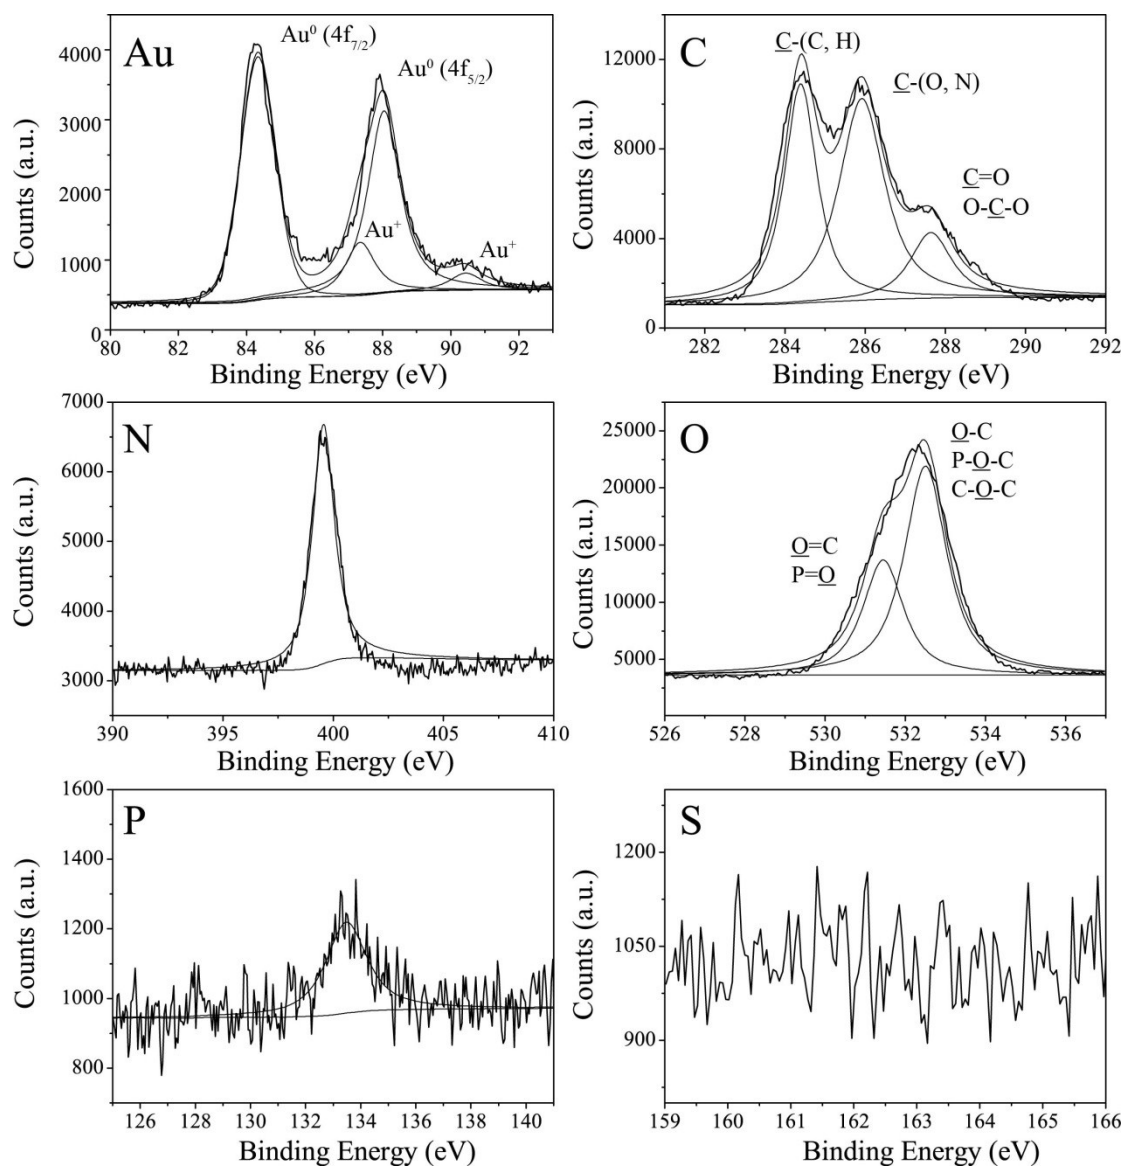

**Figure S3.** Au 4f, C1s, N1s, O1s, P2p, and S2p XPS spectra measured on the extracellular Au NPs. (The components of peak fitting in Au spectra were corresponded to  $\text{Au}^0$  (84.3 and 87.9 eV) and  $\text{Au}^+$  (87.3 and 90.4 eV))

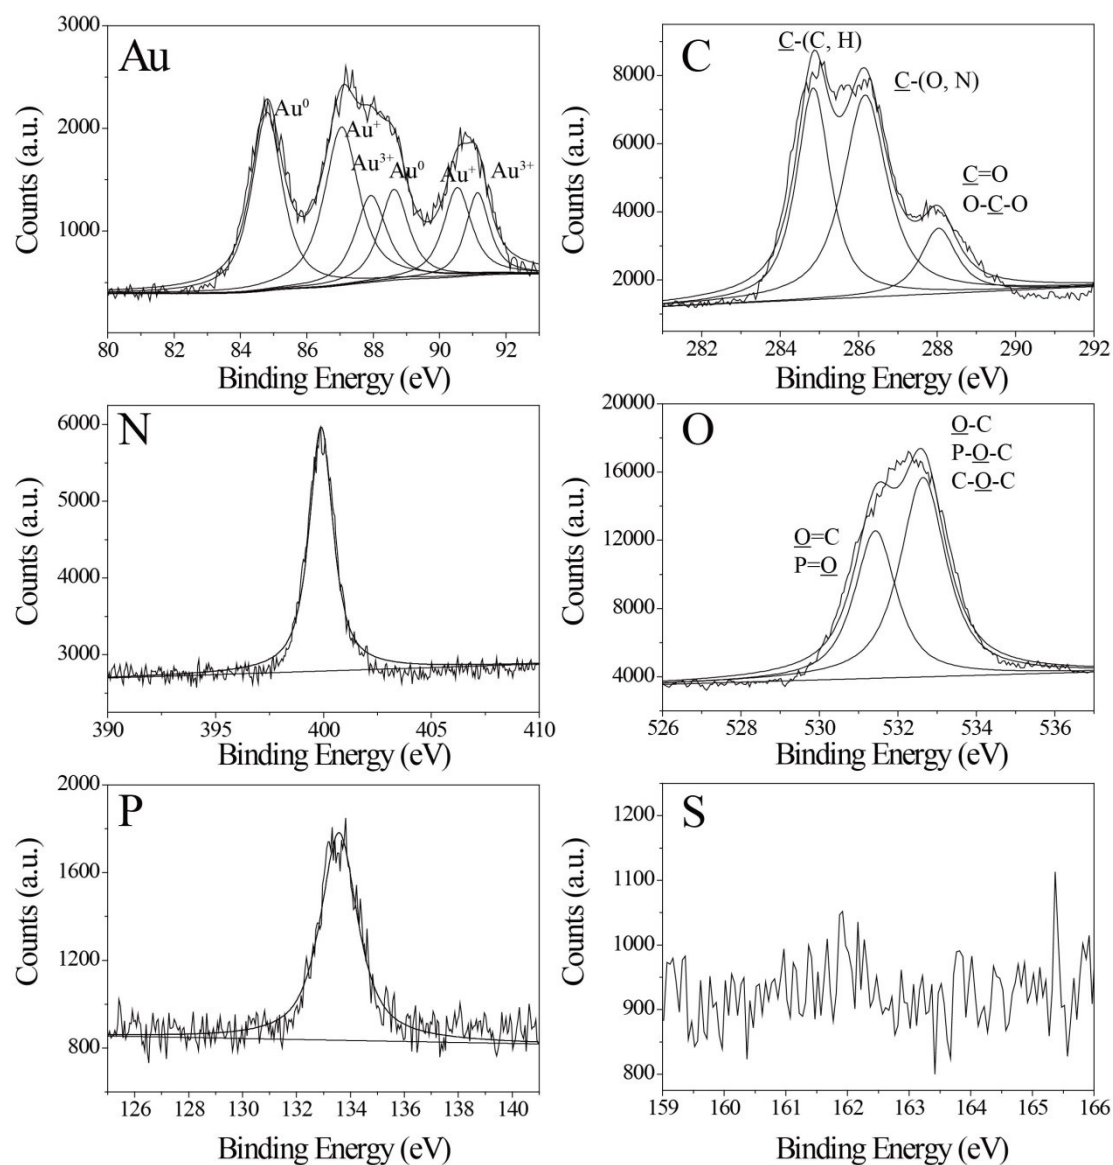

**Figure S4.** Au 4f, C1s, N1s, O1s, P2p, and S2p XPS spectra measured on the intracellular Au NPs. (The components of peak fitting in Au spectra were corresponded to  $\text{Au}^0$  (84.8 and 88.4 eV),  $\text{Au}^+$  (87.3 and 90.4 eV), and  $\text{Au}^{3+}$  (87.9 and 91.1 eV))

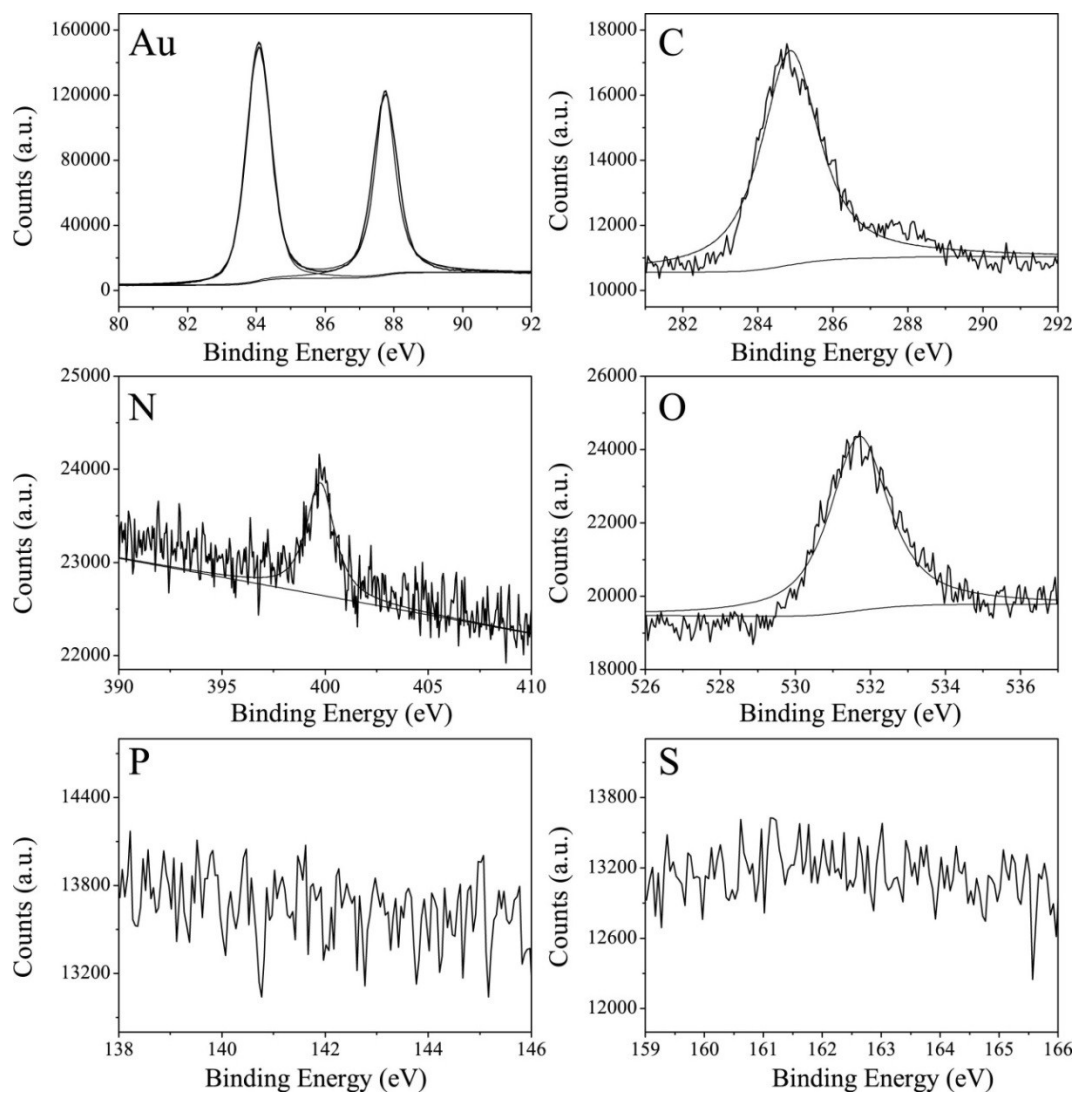

**Figure S5.** Au 4f, C1s, N1s, O1s, P2p, and S2p XPS spectra measured on the bare Au NPs(Control sample).

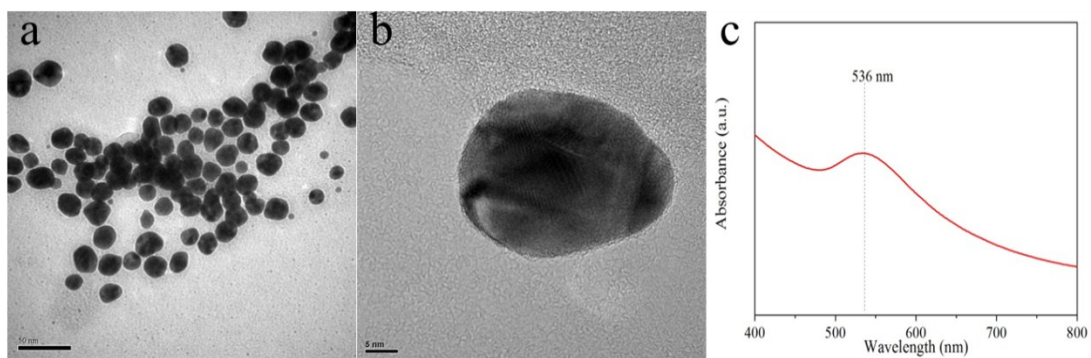

**Figure S6.** TEM images of Au NPs formed from Au(III) *in vitro* with aqueous EPS.

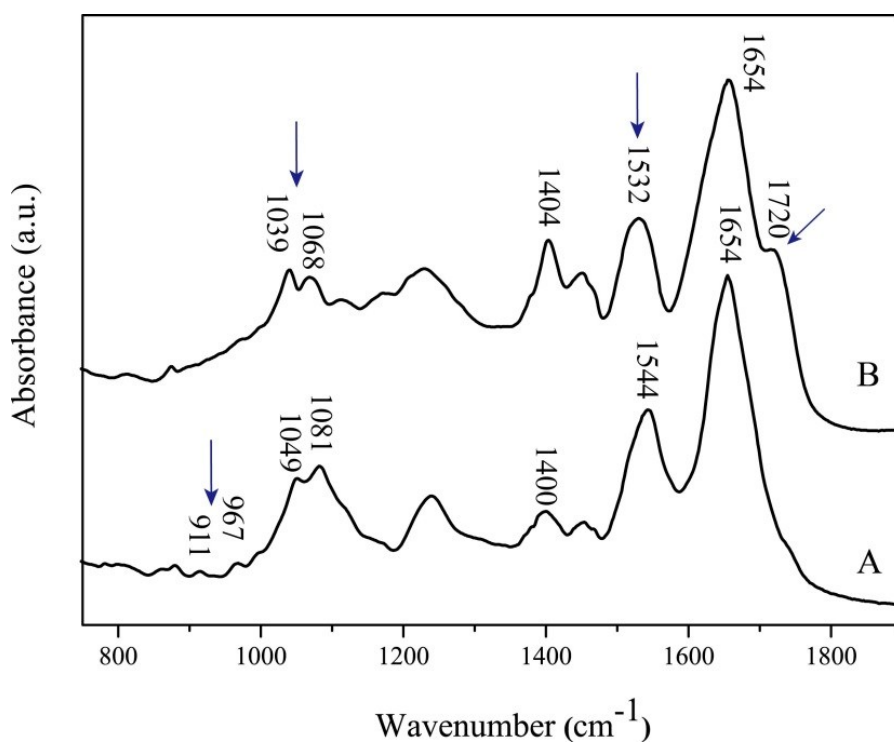

**Figure S7.** (A) Pristine EPS and (B) EPS reacted with Au(III)

**Table S5.** Assignment of peaks in FTIR spectra of pristine EPS (A) and EPS reacted with Au(III)(B) (Figure S7)<sup>35-37</sup>.

| Wavenumbers<br>(cm <sup>-1</sup> )<br>A | Wavenumbers<br>(cm <sup>-1</sup> )<br>B | Peak assignment                                                                    |
|-----------------------------------------|-----------------------------------------|------------------------------------------------------------------------------------|
|                                         | 1720                                    | C=O stretching in lipid and triglycerides                                          |
| 1654                                    | 1654                                    | C=O stretching (amide I)                                                           |
| 1544                                    | 1532                                    | N-H bending and C-N stretching (amide II), COO <sup>-</sup> asymmetric stretching. |
| 1453                                    | 1453                                    | CH <sub>2</sub> bending in lipids                                                  |
| 1400                                    | 1404                                    | COO <sup>-</sup> symmetric stretching in carboxylate                               |
| 1240                                    | 1233                                    | PO <sub>2</sub> <sup>-</sup> asymmetric stretching                                 |
| 1081                                    | 1068                                    | PO <sub>2</sub> <sup>-</sup> stretching                                            |
| 1049                                    | 1039                                    | P-O-C twisting                                                                     |
| 967                                     |                                         | C-N <sup>+</sup> -C stretching                                                     |
| 911                                     |                                         | C-O-C stretching                                                                   |
| 879                                     | 879                                     | NO <sub>2</sub> symmetric stretching                                               |
| 860                                     |                                         | PO <sub>2</sub> <sup>-</sup> symmetric twisting vibration                          |



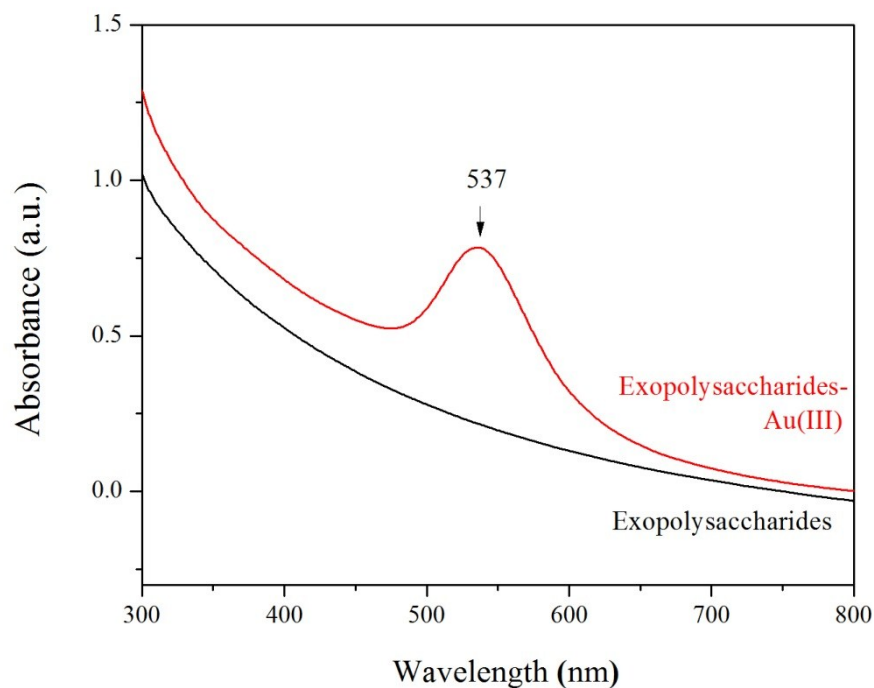

**Figure S8.** UV-Vis spectra of exopolysaccharides and exopolysaccharides reacted with Au(III).

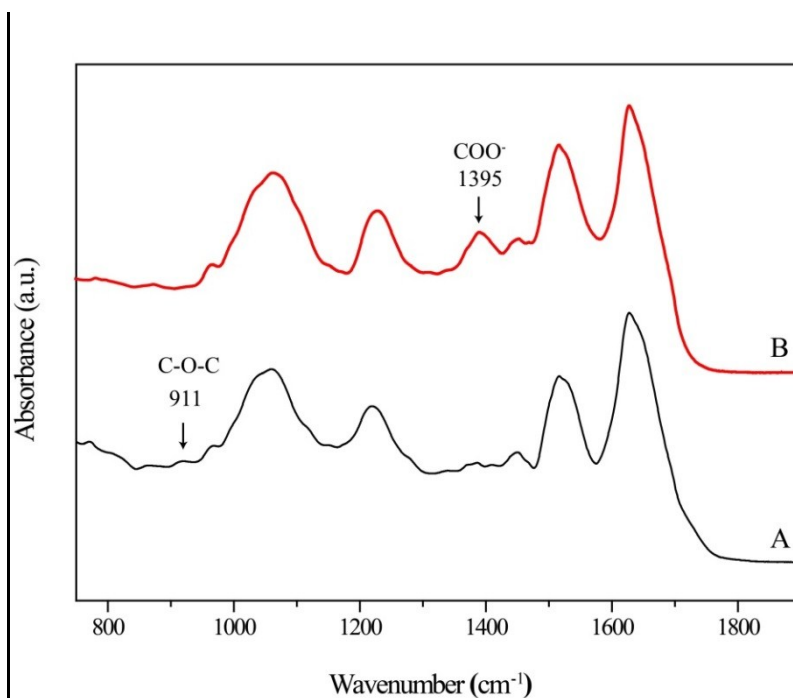

**Figure S9.** FTIR spectra of (A) exopolysaccharides, and (B) exopolysaccharides reacted with Au(III).

When exopolysaccharides were incubated with 2 mM Au(III) for 12 hours, a UV-vis peak at  $\sim 537$  nm was observed due to the surface plasmon resonance (SPR) of Au

NPs (Figure S8), confirming that exopolysaccharides can chemically reduce Au(III) to Au NPs in the EPS. Meanwhile, FTIR spectra of exopolysaccharides before and after Au(III) incubation were collected to identify the functional groups in Au(III) reduction, and the results are shown in Figure S9. The spectrum of exopolysaccharides is similar that of EPS (Figure S7), suggesting that exopolysaccharides are an important component in the EPS.

Notably, after exopolysaccharides reacted with Au(III), a new peak was resolved at  $1395\text{ cm}^{-1}$ , which is ascribed to  $\text{COO}^-$  symmetric stretching,<sup>38</sup> whereas the band at  $911\text{ cm}^{-1}$ , assigned to C-O-C stretching of acetal group,<sup>39</sup> was disappeared. This change in the C-O bands in exopolysaccharides was the same as in the EPS (Figure S7), confirming that exopolysaccharides is the specific biological component as the reducing agent in the EPS.

The reaction pathway is detailed as follows<sup>40</sup>:

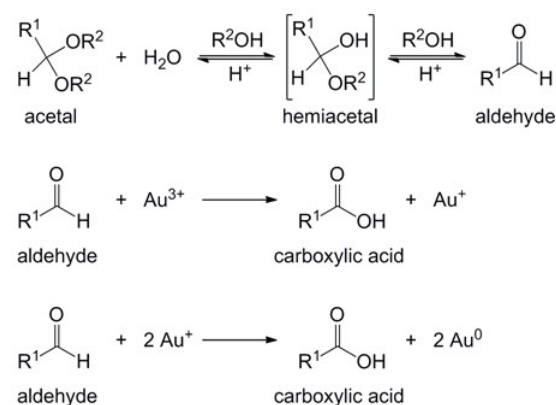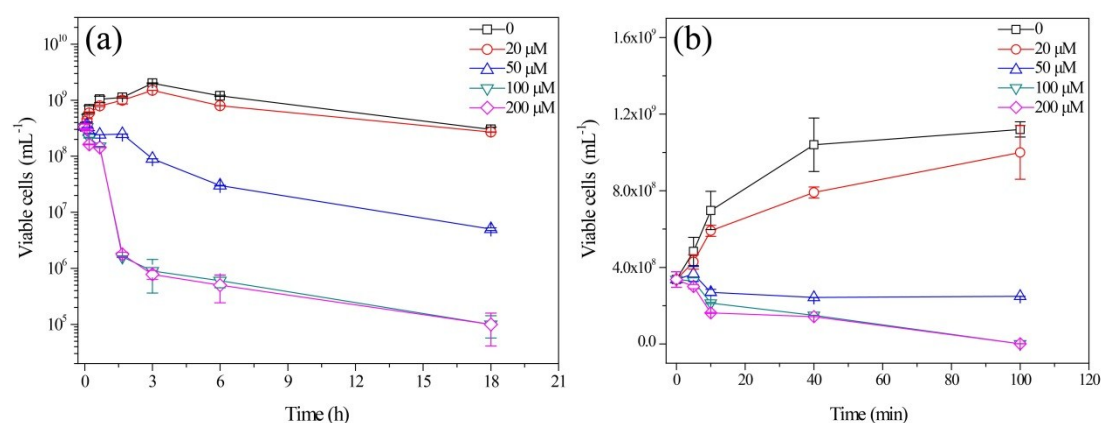

**Figure S10.** Cells change in PBS buffer with the Au(III) concentration and duration time

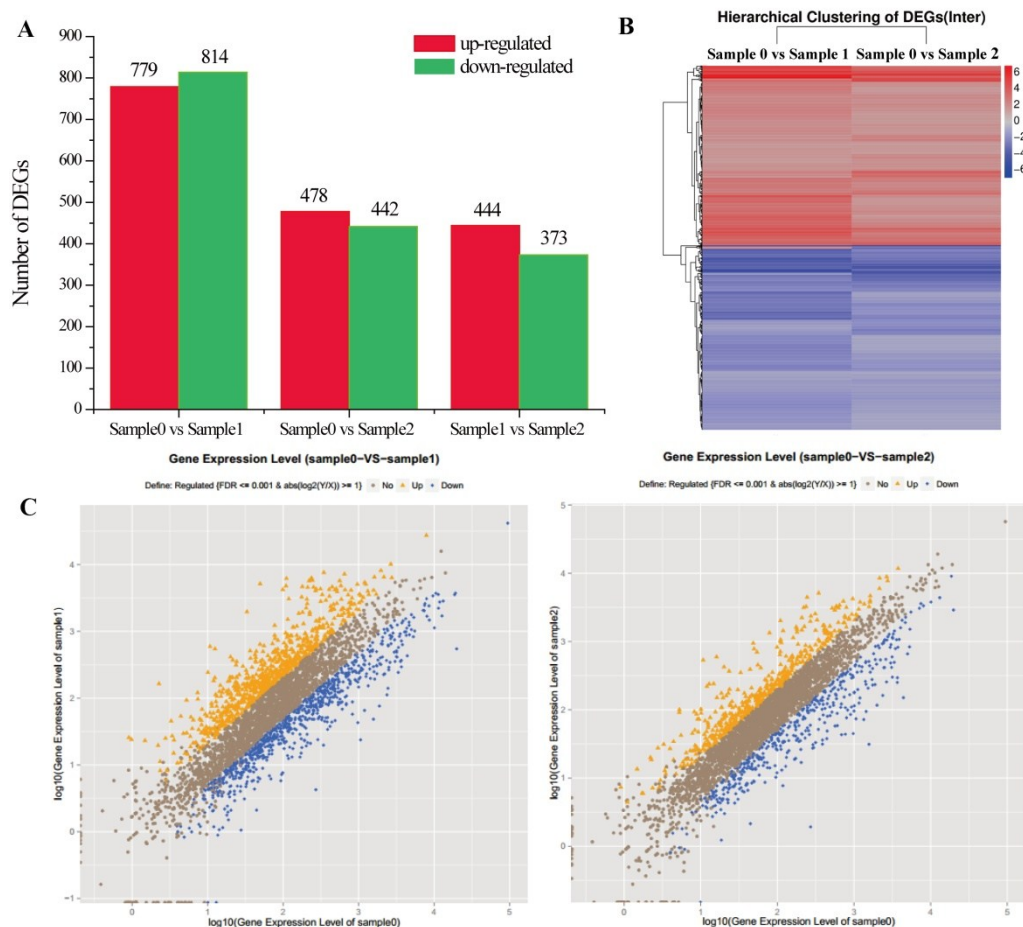

**Figure S11.** Sample0: no induction time; Sample1: with Au(III) for 10 min induction; Sample2: with Au(III) for 35 min induction. (A) Statistic chart of differently expressed genes. (B) The Hierarchical Clustering of the differentially expressed genes (DEGs) under Au(III) (Sample0 vs Sample1) vs Control (Sample0 vs Sample 2). Color scale shows log2 signal intensity values. (C) Differential gene expression by *Pantoea* sp. IMH (sample0 vs sample1) and (sample0 vs sample2).

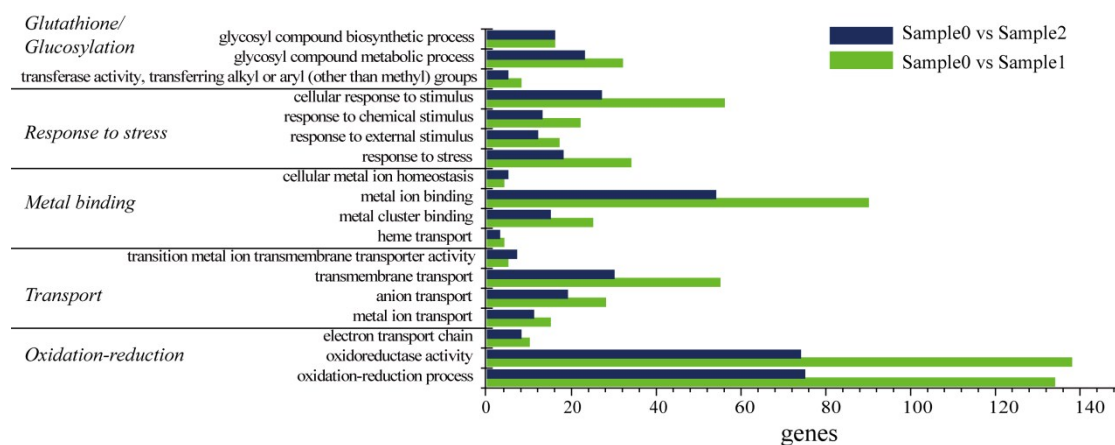

**Figure S12.** Gene Ontology (GO) functional annotation of differentially expressed genes (DEGs) in *Pantoea* sp. IMH.

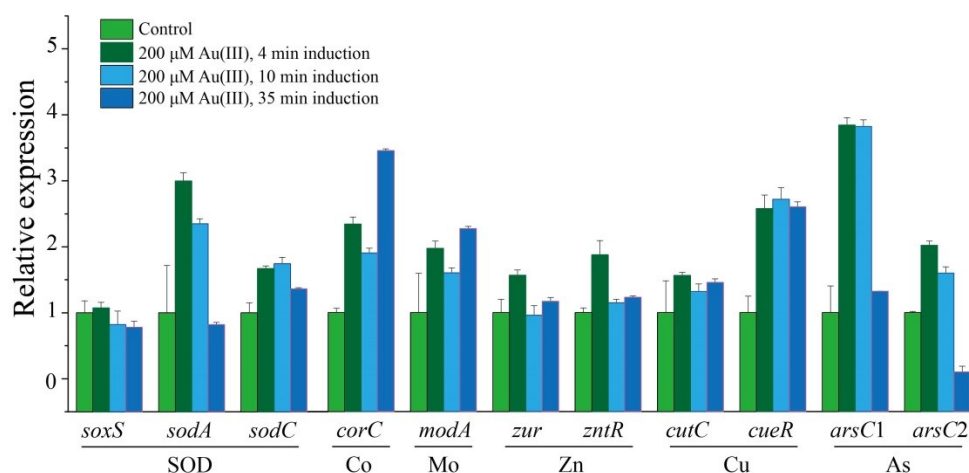

**Figure S13.** Q-PCR of differentially expressed genes in *Pantoea* sp. IMH.

**Table S6.** The annotation of genes in our study.

| Gene          | Annotation                                                                                          |
|---------------|-----------------------------------------------------------------------------------------------------|
| <i>fucO</i>   | lactaldehyde reductase                                                                              |
| <i>TC.PIT</i> | inorganic phosphate transporter, PiT family                                                         |
| <i>gloB</i>   | Glutathione metabolism: hydroxyacylglutathione hydrolase                                            |
| <i>soxR</i>   | MerR family transcriptional regulator, redox-sensitive transcriptional activator SoxR               |
| <i>soxS</i>   | AraC family transcriptional regulator, transcriptional activator of the superoxide response regulon |
| <i>soxA</i>   | superoxide dismutase, Fe-Mn family                                                                  |
| <i>soxC</i>   | Cu/Zn superoxide dismutase                                                                          |
| <i>cueO</i>   | blue copper oxidase                                                                                 |
| <i>copA</i>   | Cu <sup>2+</sup> -exporting ATPase                                                                  |
| <i>cutC</i>   | copper homeostasis protein                                                                          |
| <i>cueR</i>   | MerR family transcriptional regulator, copper efflux regulator                                      |
| <i>arsC</i>   | arsenate reductase                                                                                  |
| <i>zntR</i>   | MerR family transcriptional regulator, Zn(II)-responsive regulator of zntA                          |
| <i>zur</i>    | Fur family transcriptional regulator, zinc uptake regulator                                         |
| <i>znuB</i>   | zinc transport system permease protein                                                              |
| <i>feoB</i>   | ferrous iron transport protein B, which involved in the cobalt export process.                      |
| <i>corC</i>   | magnesium and cobalt transporter                                                                    |
| <i>modA</i>   | molybdate transport system substrate-binding protein                                                |

**Table S7.** Sequences of oligonucleotide primers used for real-time RT-PCR

| <b>Primer</b>  | <b>Gene</b>  | <b>Oligonucleotide primer sequence (5' —3' )</b> |
|----------------|--------------|--------------------------------------------------|
| <i>soxS-F</i>  | <i>soxS</i>  | CGACTGGATCGAAGAGA                                |
| <i>soxS-R</i>  | <i>soxS</i>  | GCAAACCTGACGGCGAAATAC                            |
| <i>sodA-F</i>  | <i>sodA</i>  | TCACTACCATCCCTGCCTTA                             |
| <i>sodA-R</i>  | <i>sodA</i>  | CCAGAAGAAGCTGTGGTTAGAG                           |
| <i>sodC-F</i>  | <i>sodC</i>  | CGCAGACCAAAGAGGGTAAA                             |
| <i>sodC-R</i>  | <i>sodC</i>  | GGCTCATCGGCATGGTTAT                              |
| <i>corC-F</i>  | <i>corC</i>  | CTGGTCACGATTGAGGACATTC                           |
| <i>corC-R</i>  | <i>corC</i>  | TCGGCCATAGCAACCTTAAAC                            |
| <i>modA-F</i>  | <i>modA</i>  | CGATCAGCAGTGGATGGATTAT                           |
| <i>modA-R</i>  | <i>modA</i>  | CAGGCACCCAGACTTTGTAA                             |
| <i>zur-F</i>   | <i>zur</i>   | TTCTGCTGGAACAGGGATTC                             |
| <i>zur-R</i>   | <i>zur</i>   | CATCGCAATCACGGCATAATC                            |
| <i>zntR-F</i>  | <i>zntR</i>  | TGATGGATCATGAGGTTCGC                             |
| <i>zntR-R</i>  | <i>zntR</i>  | ATAGCGTTCACTTCACTCAGAC                           |
| <i>cutC-F</i>  | <i>cutC</i>  | GTCGCTTTCCTTCGTGAACT                             |
| <i>cutC-R</i>  | <i>cutC</i>  | CAATCCACTTTCGGCACTCT                             |
| <i>cueR-F</i>  | <i>cueR</i>  | AAGAGTGTCGCGAGATGATTAG                           |
| <i>cueR-R</i>  | <i>cueR</i>  | TTTCTGCAGATGCCGTATGA                             |
| <i>arsC1-F</i> | <i>arsC1</i> | CCGTCACGATCTATCACAACC                            |
| <i>arsC1-R</i> | <i>arsC1</i> | TTCAATCAGTGCGGGATGG                              |
| <i>arsC2-F</i> | <i>arsC2</i> | GAGCCGACCGTTATTCATTATCT                          |
| <i>arsC2-R</i> | <i>arsC2</i> | GAACATCCAGCACGACTTCA                             |

## References

1. Buré, C.; Ayciriex, S.; Testet, E.; Schmitter, J. M. A Single Run LC-MS/MS Method for Phospholipidomics. *Anal. Bioanal. Chem.* **2013**, *405*, 203-213.
2. Dai, L.; Kang, G.; Li, Y.; Nie, Z.; Duan, C.; Zeng, R. In-depth Proteome Analysis of the Rubber Particle of Hevea Brasiliensis (Para Rubber Tree). *Plant Mol. Biol.* **2013**, *82*, 155-168.
3. Ravel, B.; Newville, M. Athena, Artemis, Hephaestus: Data Analysis for X-ray Absorption Spectroscopy Using IFEFFIT. *J. Synchrotron. Radiat.* **2005**, *12*, 537-541.
4. Cui, J.; Shi, J.; Jiang, G.; Jing, C. Arsenic Levels and Speciation from Ingestion Exposures to Biomarkers in Shanxi, China: Implications for Human Health. *Environ. Sci. Technol.* **2013**, *47*, 5419-5424.
5. Kang, F. X.; Alvarez, P. J.; Zhu, D. Q., Microbial Extracellular Polymeric Substances Reduce Ag<sup>+</sup> to Silver Nanoparticles and Antagonize Bactericidal Activity. *Environ. Sci. Technol.* **2014**, *48*, 316-322.
6. Shao, L. I.; Wu, Z.; Zhang, H.; Chen, W.; Ai, L.; Guo, B, Partial characterization and immunostimulatory activity of exopolysaccharides from *Lactobacillus rhamnosus* KF5. *Carbohydr. Polym.* **2014**, *107*, 51-56.
7. Guo, L.; Han, L.; Yang, L.; Zeng, H.; Fan, D.; Zhu, Y.; Zhou, D. Genome and Transcriptome Analysis of the Fungal Pathogen *Fusarium oxysporum* f. sp. *cubense* causing Banana Vascular Wilt Disease. *PLoS One* **2014**, *9*, e95543.
8. Bullard, J. H.; Purdom, E.; Hansen, K. D.; Dudoit, S. Evaluation of Statistical Methods for Normalization and Differential Expression in mRNA-Seq experiments. *BMC Bioinf.* **2010**, *11*, 94.
9. Chen, S.; Yang, P.; Jiang, F.; Wei, Y.; Ma, Z. De novo Analysis of Transcriptome Dynamics in the Migratory Locust during the Development of Phase Traits. *PLoS One* **2010**, *5*, e15633.
10. Livak, K. J.; Schmittgen, T. D. Analysis of Relative Gene Expression Data using Real-time Quantitative PCR and the 2- $\Delta\Delta$ CT method. *Methods*, 2001; pp 402-408.
11. Beveridge, T. J.; Murray, R. G. E., Sites of Metal-Deposition in the Cell-Wall of *Bacillus subtilis*. *J. Bacteriol.* **1980**, *141*, 876-887.
12. Lengke, M. F.; Fleet, M. E.; Southam, G., Morphology of Gold Nanoparticles Synthesized by Filamentous Cyanobacteria from Gold(I)-thiosulfate and Gold(III)-chloride Complexes. *Langmuir* **2006**, *22*, 2780-2787.
13. Reith, F.; Rogers, S. L.; McPhail, D. C.; Webb, D., Biomineralization of Gold: Biofilms on Bacterioform Gold. *Science* **2006**, *313*, 233-236.

14. He, S.; Guo, Z.; Zhang, Y.; Zhang, S.; Gu, J. W., Biosynthesis of Gold Nanoparticles Using the Bacteria *Rhodopseudomonas capsulata*. *Mater. Lett.* **2007**, *61*, 3984-3987.
15. Reith, F.; Etschmann, B.; Grosse, C.; Moors, H.; Benotmane, M. A.; Monsieurs, P.; Grass, G.; Doonan, C.; Vogt, S.; Lai, B.; Martinez-Criado, G.; George, G. N.; Nies, D. H.; Mergeay, M.; Pring, A.; Southam, G.; Brugger, J., Mechanisms of Gold Biomineralization in the Bacterium *Cupriavidus metallidurans*. *Proc. Natl. Acad. Sci. U. S. A.* **2009**, *106*, 17757-17762.
16. Kalishwaralal, K.; Deepak, V.; Pandian, S. R. K.; Kottaisamy, M.; BarathManiKanth, S.; Kartikeyan, B.; Gurunathan, S., Biosynthesis of Silver and Gold Nanoparticles Using *Brevibacterium casei*. *Colloids Surf., B* **2010**, *77*, 257-262.
17. Konishi, Y.; Tsukiyama, T.; Tachimi, T.; Saitoh, N.; Nomura, T.; Nagamine, S., Microbial Deposition of Gold nanoparticles by the Metal-reducing Bacterium *Shewanella algae*. *Electrochim. Acta* **2007**, *53*, 186-192.
18. Focsan, M.; Ardelean, I. I.; Craciun, C.; Astilean, S., Interplay between Gold Nanoparticle Biosynthesis and Metabolic Activity of cyanobacterium *Synechocystis* sp PCC 6803. *Nanotechnology* **2011**, *22*,
19. Ravindranath, S. P.; Henne, K. L.; Thompson, D. K.; Irudayaraj, J., Raman Chemical Imaging of Chromate Reduction Sites in a Single Bacterium Using Intracellularly Grown Gold Nanoislands. *Acs Nano* **2011**, *5*, 4729-4736.
20. Arunkumar, P.; Thanalakshmi, M.; Kumar, P.; Premkumar, K., *Micrococcus Luteus* Mediated Dual Mode Synthesis of Gold Nanoparticles: Involvement of Extracellular Alpha-amylase and Cell wall teichuronic acid. *Colloids Surf., B* **2013**, *103*, 517-522.
21. Girilal, M.; Fayaz, A. M.; Balaji, P. M.; Kalaichelvan, P. T., Augmentation of PCR Efficiency Using Highly Thermostable Gold Nanoparticles Synthesized from a Thermophilic bacterium, *Geobacillus stearothermophilus*. *Colloids Surf., B* **2013**, *106*, 165-169.
22. Johnston, C. W.; Wyatt, M. A.; Li, X.; Ibrahim, A.; Shuster, J.; Southam, G.; Magarvey, N. A., Gold Biomineralization by a Metallophore from a Gold-Associated Microbe. *Nat. Chem. Biol.* **2013**, *9*, 241-243.
23. Varia, J. C.; Zegeye, A.; Velasquez-Orta, S.; Bull, S., Process Analysis of AuCl<sub>4</sub>-Sorption Leading to Gold Nanoparticle Synthesis by *Shewanella putrefaciens*. *Chem. Eng. J.* **2016**, *288*, 482-488.
24. Srivastava, S. K.; Yamada, R.; Ogino, C.; Kondo, A., Biogenic Synthesis and Characterization of Gold Nanoparticles by *Escherichia coli* K12 and Its Heterogeneous Catalysis in Degradation of 4-nitrophenol. *Nanoscale Res. Lett.* **2013**, *8*, 70.
25. Govindaraju, K.; Basha, S. K.; Kumar, V. G.; Singaravelu, G., Silver, Gold and Bimetallic Nanoparticles Production Using Single-cell Protein (*Spirulina platensis*) Geitler. *J. Mater. Sci.* **2008**, *43*, 5115-5122.

26. Lengke, M.; Southam, G., Bioaccumulation of Gold by Sulfate-reducing Bacteria Cultured in the Presence of Gold(I)-thio Sulfate Complex. *Geochim. Cosmochim. Acta* **2006**, *70*, 3646-3661.
27. Kalishwaralal, K.; Deepak, V.; Pandian, S. R. K.; Gurunathan, S., Biological Synthesis of Gold Nanocubes from *Bacillus licheniformis*. *Bioresour. Technol.* **2009**, *100*, 5356-5358.
28. Feng, Y.; Yu, Y.; Wang, Y.; Lin, X., Biosorption and Bioreduction of Trivalent Aurum by Photosynthetic Bacteria *Rhodobacter capsulatus*. *Curr. Microbiol.* **2007**, *55*, 402-408.
29. Wen, L.; Lin, Z.; Gu, P.; Zhou, J.; Yao, B.; Chen, G.; Fu, J., Extracellular Biosynthesis of Monodispersed Gold Nanoparticles by a SAM Capping Route. *J. Nanopart. Res.* **2009**, *11*, 279-288.
30. Du, L.; Jiang, H.; Liu, X.; Wang, E., Biosynthesis of Gold Nanoparticles Assisted by *Escherichia coli* DH5  $\alpha$  and Its application on Direct Electrochemistry of Hemoglobin. *Electrochem. Commun.* **2007**, *9*, 1165-1170.
31. Nair, B.; Pradeep, T., Coalescence of Nanoclusters and Formation of Submicron Crystallites Assisted by *Lactobacillus* strains. *Cryst. Growth Des.* **2002**, *2*, 293-298.
32. Severin, A.; Nickbarg, E.; Wooters, J.; Quazi, S. A.; Matsuka, Y. V.; Murphy, E.; Moutsatsos, I. K.; Zagursky, R. J.; Olmsted, S. B., Proteomic Analysis and Identification of *Streptococcus Pyogenes* Surface-Associated Proteins. *J. Bacteriol.* **2007**, *189*, 1514-1522.
33. Xu, M.; Bijoux, H.; Gonzalez, P.; Mounicou, S., Investigating the Response of Cuproproteins from Oysters (*Crassostrea gigas*) after Waterborne Copper Exposure by Metallomic and Proteomic Approaches. *Metallomics* **2014**, *6*, 338-346.
34. Bateman, A.; Martin, M. J.; O'Donovan, C.; Magrane, M.; Apweiler, R.; Alpi, E.; Antunes, R.; Arganiska, J.; Bely, B.; Bingley, M.; Bonilla, C.; Britto, R.; Bursteinas, B.; Chavali, G.; Cibrian-Uhalte, E.; Da Silva, A.; De Giorgi, M.; Dogan, T.; Fazzini, F.; Gane, P. *et al.*, UniProt: a Hub for Protein Information. *Nucleic Acids Res.* **2015**, *43*, D204-D212.
35. Schmitt, J.; Flemming, H. C., FTIR-Spectroscopy in Microbial and Material Analysis. *Int. Biodeterior. Biodegrad.* **1998**, *41*, 1-11.
36. Bosch, A.; Minan, A.; Vescina, C.; Degrossi, J.; Gatti, B.; Montanaro, P.; Messina, M.; Franco, M.; Vay, C.; Schmitt, J.; Naumann, D.; Yantorno, O., Fourier Transform Infrared Spectroscopy for Rapid Identification of Nonfermenting Gram-negative Bacteria Isolated from Sputum Samples from Cystic Fibrosis Patients. *J. Clin. Microbiol.* **2008**, *46*, 2535-2546.
37. Fischer, G.; Braun, S.; Thissen, R.; Dott, W., FT-IR Spectroscopy as a Tool for Rapid Identification and Intra-Species Characterization of Airborne Filamentous Fungi. *J. Microbiol. Methods* **2006**, *64*, 63-77.



38. Maquelin, K.; Kirschner, C.; Choo-Smith, L. P.; van den Braak, N.; Endtz, H. P.; Naumann, D.; Puppels, G. J., Identification of medically relevant microorganisms by vibrational spectroscopy. *J. Microbiol. Methods* **2002**, *51*, 255-271.
39. Movasaghi, Z.; Rehman, S.; ur Rehman, D. I., Fourier transform infrared (FTIR) spectroscopy of biological tissues. *Appl. Spectrosc. Rev.* **2008**, *43*, 134-179.
40. Kang, F.; Qu, X.; Alvarez, P. J.; Zhu, D., Extracellular saccharide-mediated reduction of  $\text{Au}^{3+}$  to gold nanoparticles: new insights for heavy metals biomineralization on microbial surfaces. *Environmental science & technology Environ. Sci. Technol.* **2017**, *51*, 2776-2785.
